# Supplementary material for: Epha1 is a cell-surface marker for the neuromesodermal competent population
Source: Oxford University Press journal article supplement (doi:10.1242/dev.198812), 2022-03-15
Supplement: dev198812supp.pdf [file dev198812supp.pdf]

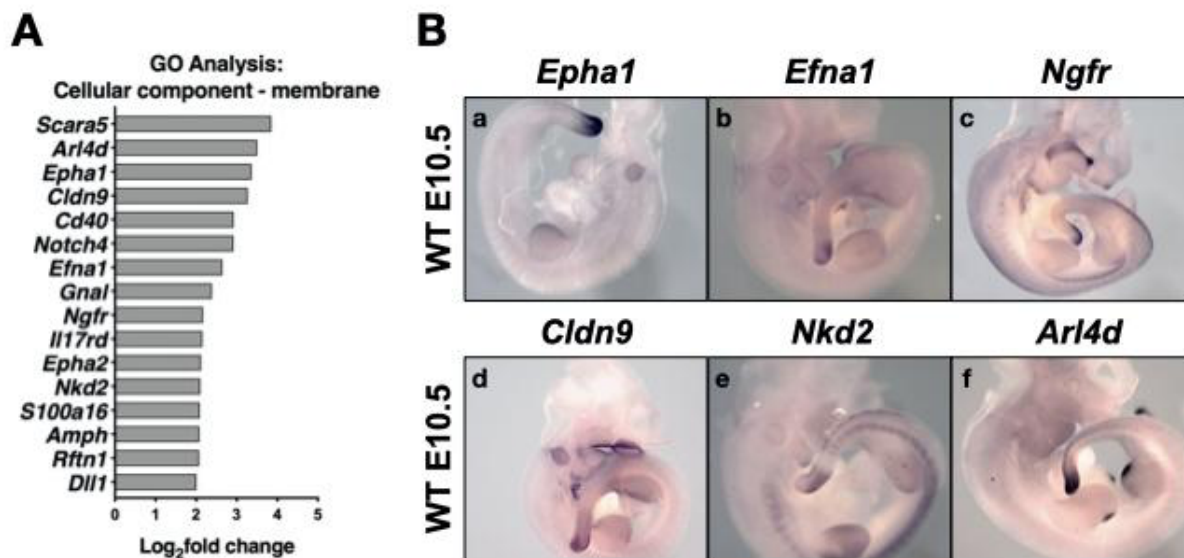

**Fig. S1. Identification of potential cell-surface markers for axial progenitors. A.** Differentially expressed genes encoding for plasma membrane proteins according to gene ontology classification. **B.** Whole mount ISH of E10.5 embryos using probes for *Epha1* (a), *Efna1* (b), *Ngfr* (c), *Cldn9* (d), *Nkd2* (e) and *Arl4d* (f).

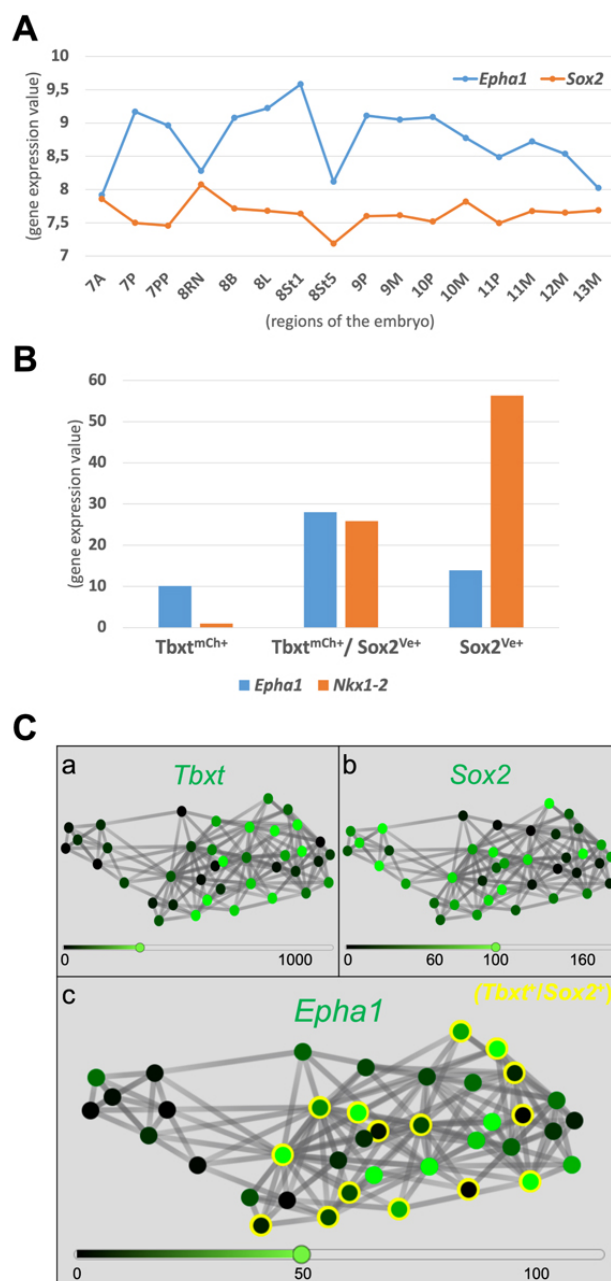

**Fig. S2. *Epha1* expression in cells of NMC-populations.** A. Microarray data from (Wymeersch et al., 2019) indicates that *Epha1* is expressed at the posterior region of the mouse embryo during the emergence of NMC cells (“7P” - E7.5 posterior epiblast) and by E8.5 is highly expressed in NMC-regions (“8B” = NSB and “8L” = CLE). During tailbud stages, *Epha1* is highly expressed in the CNH (“9M = E9.5 CNH; “10M” = E10.5 CNH; “11M” = E11.5 CNH and “12M” = E12.5 CNH) and its expression decays with the end of axis elongation (“13M” = E13.5 CNH). Contrasting with regions that contain lateral and paraxial mesoderm progenitors (LPMPs) (Wymeersch et al., 2016) (“7PP” = posterior-most part of the epiblast at E7.5 and “8St5” = posterior-most part of the primitive streak at E8.5), the regions with early mesoderm progenitors are also high *Epha1* positive (“8St1” = anterior part of the primitive streak at E8.5; “9P”, “10P” and “11P” = region posterior to the CNH at E9.5, E10.5 and E11.5, respectively).

*Epha1* is not expressed in the anterior part of the embryo at E7.5 (“7A”) and also in the rostral node region at E8.5 (“8RN”), where notochord progenitors are present. **B.** Comparison between *Epha1* and *Nkx1-2* expression in sorted *Tbxt*<sup>+</sup>, *Sox2*<sup>+</sup> and *Tbxt*<sup>+</sup>/*Sox2*<sup>+</sup> cells at E8.5 (from Koch et al., 2017). *Epha1* is among the 154 genes that are highly expressed in *Tbxt*<sup>+</sup>/*Sox2*<sup>+</sup> cells (group1 in Koch et al., 2017) and its expression in *Tbxt*-mCh<sup>+</sup>/*Sox2*-Ve<sup>+</sup> cells is slightly higher than *Nkx1-2*. **C.** *Epha1* is expressed in *Tbxt*<sup>+</sup>/*Sox2*<sup>+</sup> single-cells from E8.5 CLE (from Gouti et al., 2017). *Tbxt* (**Ca**) and *Sox2* (**Cb**) expression in microdissected single cells from the E8.5 CLE. *Epha1* is expressed in the majority (2/3) of *Tbxt* and *Sox2* double positive cells (circled in yellow) (**Cc**).

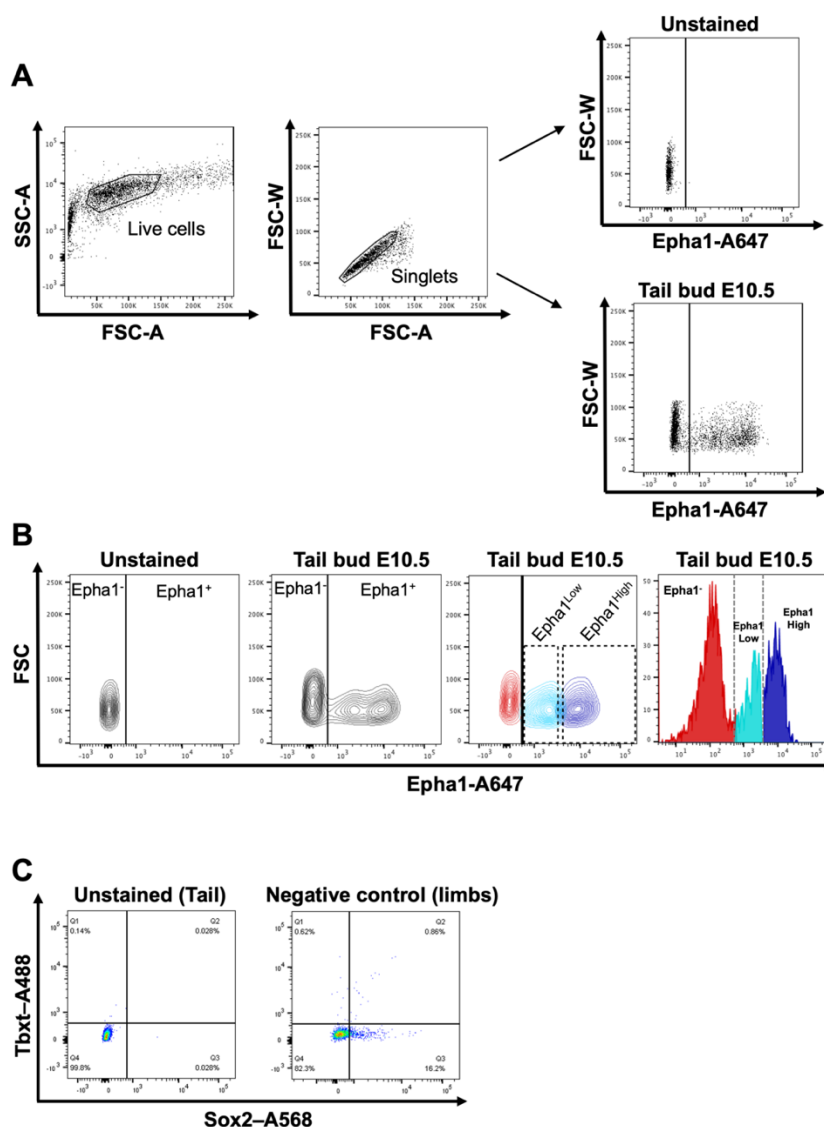

**Fig. S3. Gating strategy for FACS analysis used to define Epha1 positive cells and Sox2/Tbx1 quadrants.** **A.** Representative example of exclusion of debris and doublets cells (using forward scatter and side scatter gates) and definition of Epha1 gating. **B.** Representative gating scheme illustrating the two subpopulations for Epha1-positive cells: Epha1<sup>Low</sup> (light blue) and Epha1<sup>High</sup> (dark blue), and a representative histogram showing two peaks with different fluorescent intensity in the Epha1-A647 channel, corresponding to the defined Epha1<sup>Low</sup> and Epha1<sup>High</sup> populations. All gates were firstly set using unstained control. **C.** Gating strategy for defining intracellular staining of Sox2-A568 and Tbx1-A488 on unstained cells from tail and stained cells from forelimbs (negative control) of E10.5 mouse embryos.

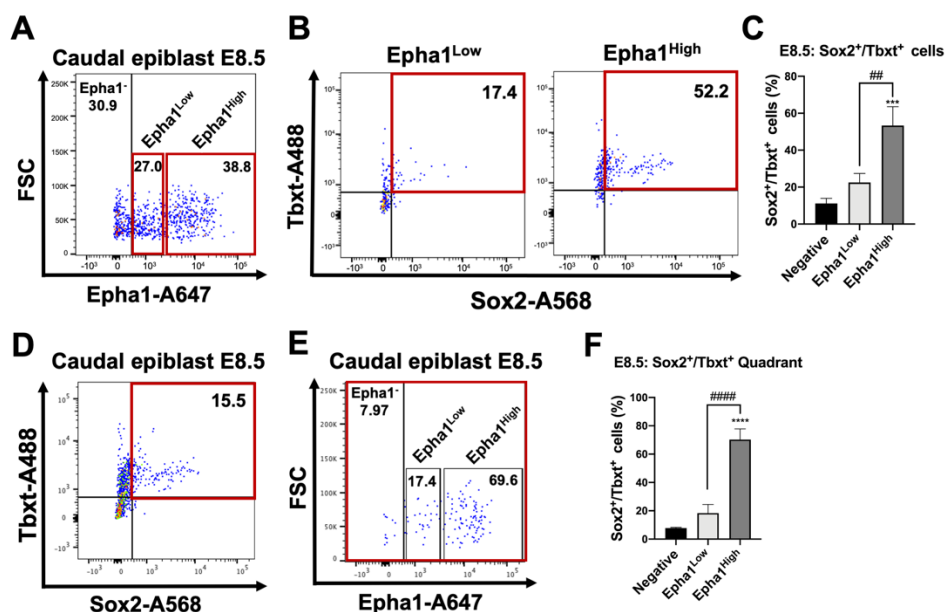

**Fig. S4. Flow cytometry analysis of Epha1 subpopulations that co-express Sox2 and Tbx1 in E8.5 embryos.** **A.** FACS dot-plot displaying Epha1 subpopulations of E8.5 posterior ends. **B.** FACS profiles of Sox2 and Tbx1 expression in cells from the Epha1<sup>Low</sup> and Epha1<sup>High</sup> compartments indicated in A. **C.** Quantification of Sox2<sup>+</sup>/Tbx1<sup>+</sup> cells within the different Epha1 subpopulations from posterior ends of E8.5 (from Table 1). **D.** FACS dot-plot displaying Sox2 and Tbx1 expression in cells from the posterior regions of E8.5 embryos. **E.** FACS profile showing distribution of Sox2<sup>+</sup>/Tbx1<sup>+</sup> cells from the red window in D among the Epha1 compartments. **F.** Quantification of the distribution of Sox2<sup>+</sup>/Tbx1<sup>+</sup> cells from the posterior region of E8.5 embryos between the different Epha1 subpopulations (from Table 2).

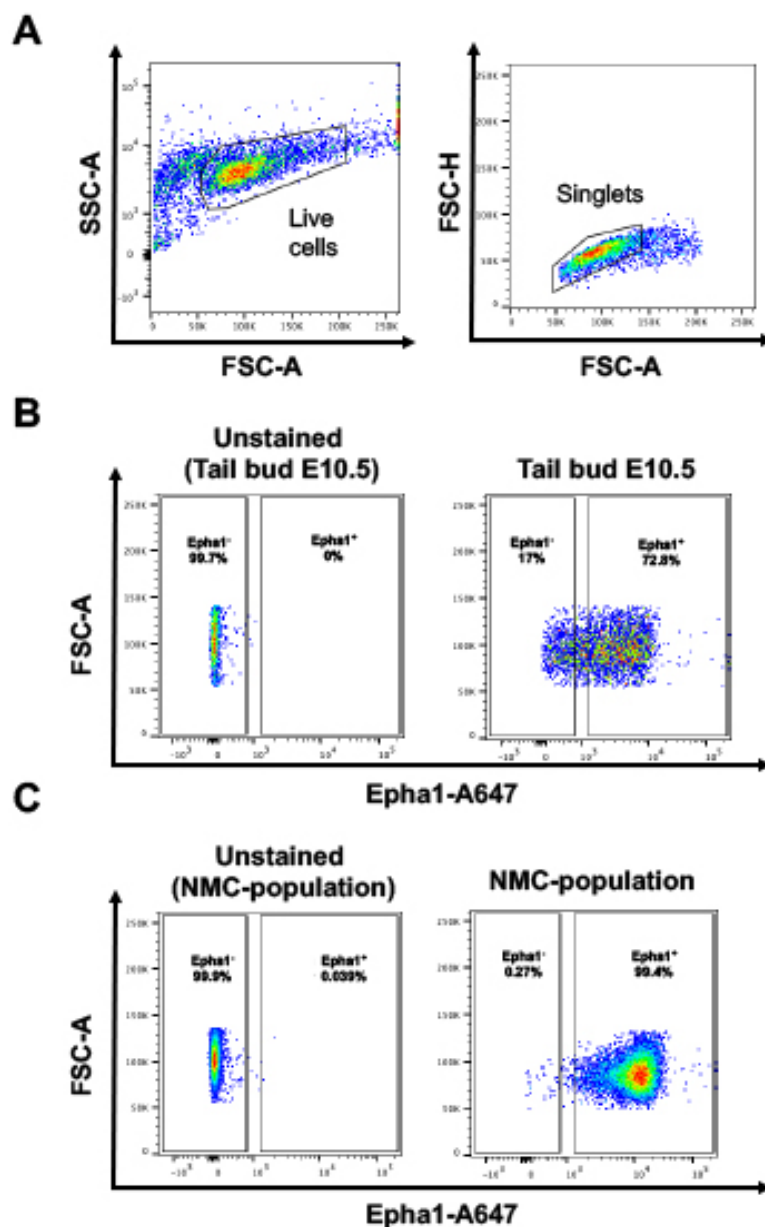

**Fig. S5. Gating strategy for FACS-sorting of Epha1<sup>+</sup> and Epha1<sup>-</sup> cells from E10.5 tail buds and *in vitro* derived NMC-populations for *in vitro* culture experiments. A.** Cells were first gated for singlets discrimination using side and forward scatter detectors. **B.** Representative sorting gates for Epha1 positive and negative populations from E10.5 Tail buds. **C.** Representative sorting gates for Epha1 positive and negative populations from *in vitro* derived NMC-populations.

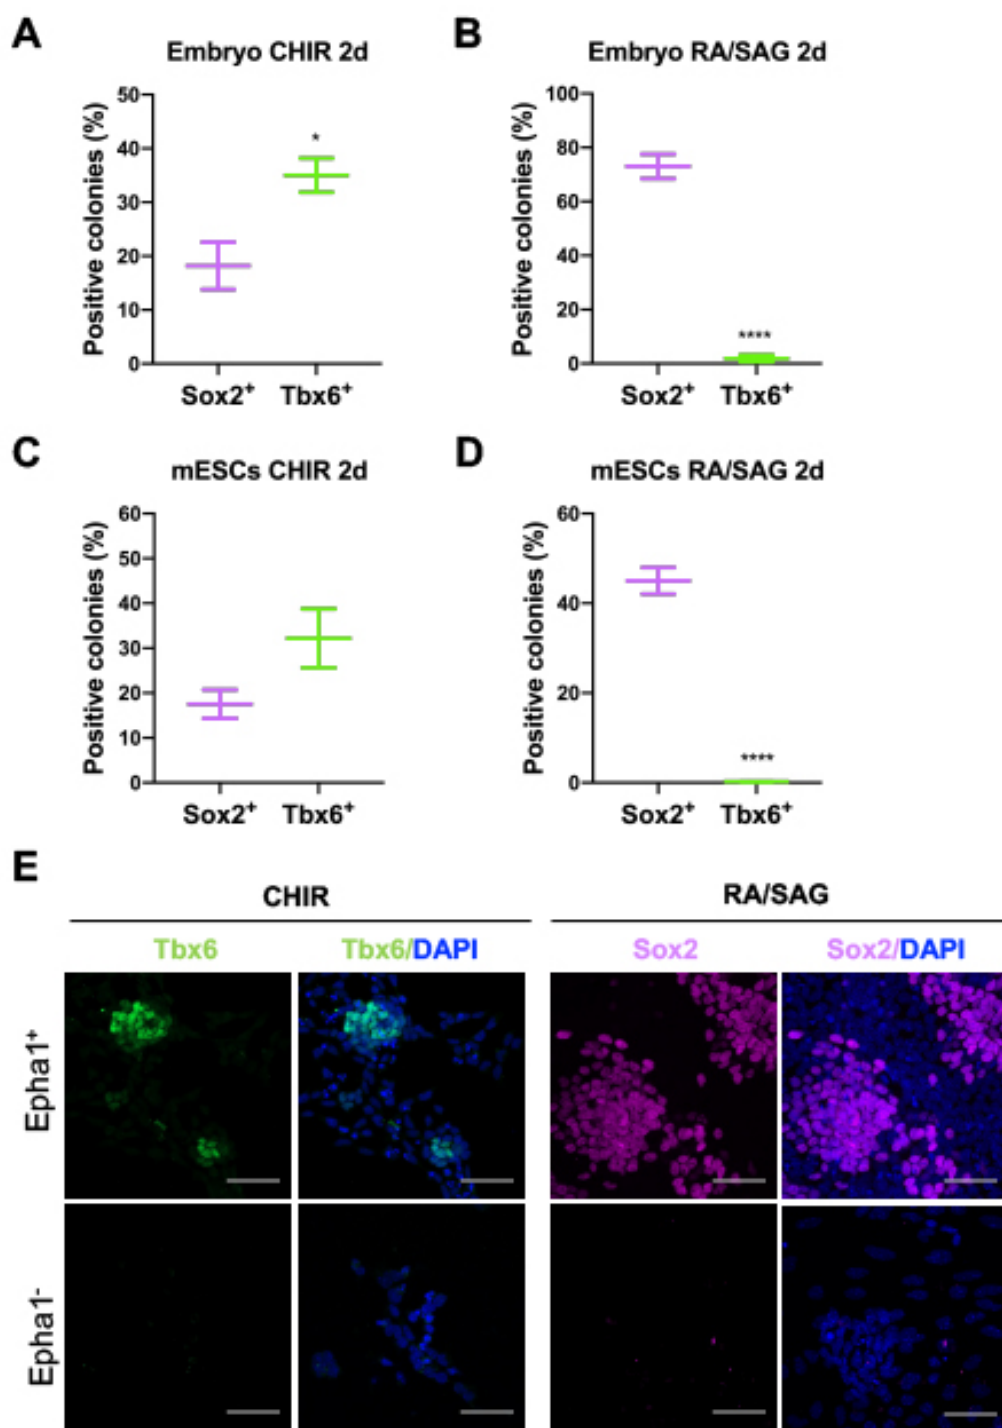

**Fig. S6. Differentiation potential of sorted populations.** A-D. Quantification of neural (Sox2<sup>+</sup>) and mesodermal (Tbx6<sup>+</sup>) derivatives over DAPI of Epha1<sup>+</sup> sorted cells from Embryo (E10.5) and mESCs differentiated with CHIR or RA/SAG. Five fields for each condition were counted and the results are presented as mean±SEM. Statistical analysis was assessed using Student's t-test. \*p<0.05 and \*\*\*\*p<0.0001. E. Immunofluorescence staining of Epha1<sup>+</sup> and Epha1<sup>-</sup> sorted cells from E10.5 embryo tail buds, differentiated towards mesodermal (CHIR) or neural (RA/SAG) derivatives. Scale bar: 50 μm. "mESCs" means mouse embryonic stem cells.

**Table S1.** CuffDiff2 differential gene expression analysis between Tail<sup>Desc</sup> and Tail<sup>Prog</sup> cell populations. (attached excel file).

[Click here to download Table S1](#)

**Table S2.** CuffDiff2 differential gene expression analysis between Tail<sup>Desc</sup> and Tail<sup>Tot</sup> cell populations. (attached excel file).

[Click here to download Table S2](#)

**Table S3.** DEseq2 differential expression analysis between Epha1<sup>High</sup> and Epha1<sup>Low</sup> cell populations. (attached excel file).

[Click here to download Table S3](#)

**Table S4.** DEseq2 normalized counts from Tail<sup>Desc</sup>, Tail<sup>Prog</sup>, Epha1<sup>High</sup> and Epha1<sup>Low</sup> cell populations (attached excel file)

[Click here to download Table S4](#)

**Table S5.** List of primers used in this work.

| <b>Primers for genotyping (sequence 5' to 3')</b> |         |                       |
|---------------------------------------------------|---------|-----------------------|
| <b>cre</b>                                        | Forward | CGAGTGATGAGGTTTCGCAAG |
|                                                   | Reverse | CACCAGCTTGCATGATCT    |
| <b>YFP wild type Allele</b>                       | Forward | CTGGCTTCTGAGGACCG     |
|                                                   | Reverse | CAGGACAACGCCCCACACA   |
| <b>YFP mutant Allele</b>                          | Forward | AGGGCGAGGAGCTGTTCA    |
|                                                   | Reverse | TGAAGTCGATGCCCTTCAG   |



| <b>Primers for RT-qPCR (sequence 5' to 3')</b>                      |         |                               |
|---------------------------------------------------------------------|---------|-------------------------------|
| <b><i>β-Actin</i></b>                                               | Forward | ATGAAGATCCTGACCGAGCG          |
|                                                                     | Reverse | TACTTGCGCTCAGGAGGAGC          |
| <b><i>Arl4d</i></b>                                                 | Forward | GCCTCGAGGGCTGAAGACACCCCAGCTT  |
|                                                                     | Reverse | CTGAATTCGCCTTGCTGATCCGGTGTA   |
| <b><i>Cdx2</i></b>                                                  | Forward | GCGAAACCTGTGCGAGTGGATG        |
|                                                                     | Reverse | TTTCCTCTCCTTGGCTCTGCG         |
| <b><i>Cldn9</i></b>                                                 | Forward | GCCTCGAGGGCTGGCTAGGAACTTTGGT  |
|                                                                     | Reverse | CTGAATTCGGACACGTACAGCAGAGGAG  |
| <b><i>Efna1</i></b>                                                 | Forward | GCCTCGAGCTCTCTTGGGTCTGTGCTGC  |
|                                                                     | Reverse | CTGAATTCGTA CTCCGGGTCATCTGCTT |
| <b><i>Epha1</i></b>                                                 | Forward | GCCTCGAGCAAGATTGCAAGACTGTGGC  |
|                                                                     | Reverse | CTGAATTCCTCCACATTACAATCCCA    |
| <b><i>Mesp2</i></b>                                                 | Forward | GCCATGAGTAGTGGGGTGTG          |
|                                                                     | Reverse | GTCAGCGGCTCTTTCTAGGG          |
| <b><i>Ngfr</i></b>                                                  | Forward | GCCTCGAGTGCCTGGACAGTGTACGTT   |
|                                                                     | Reverse | CTGAATTCAGGAATGAGGTTGTCAGCGG  |
| <b><i>Nkd2</i></b>                                                  | Forward | GCCTCGAGGGAGAGAGAGTCCCGAAGGG  |
|                                                                     | Reverse | CTGAATTCACATGTCCTCTCTGGTGACTT |
| <b><i>Olig2</i></b>                                                 | Forward | TTACAGACCGAGCCAACACC          |
|                                                                     | Reverse | TCAACCTTCCGAATGTGAATTAGA      |
| <b><i>Sox2</i></b>                                                  | Forward | TTTGTCCGAGACCGAGAAGC          |
|                                                                     | Reverse | CTCCGGAAGCGTGTACTTA           |
| <b><i>Tbxt</i></b>                                                  | Forward | ACCCAGCTCTAAGGAACCAC          |
|                                                                     | Reverse | GCTGGCGTTATGACTCACAG          |
| <b><i>Wnt3a</i></b>                                                 | Forward | ATTGAATTTGGAGGAATGGT          |
|                                                                     | Reverse | CTTGAAGTACGTGTAACGTG          |
| <b>Primers for in situ hybridization probes (sequence 5' to 3')</b> |         |                               |
| <b><i>Arl4d</i></b>                                                 | Forward | GCCTCGAGGGCTGAAGACACCCCAGCTT  |
|                                                                     | Reverse | CTGAATTCGCCTTGCTGATCCGGTGTA   |
| <b><i>Cldn9</i></b>                                                 | Forward | GCCTCGAGGGCTGGCTAGGAACTTTGGT  |
|                                                                     | Reverse | CTGAATTCGGACACGTACAGCAGAGGAG  |
| <b><i>Efna1</i></b>                                                 | Forward | GCCTCGAGCTCTCTTGGGTCTGTGCTGC  |
|                                                                     | Reverse | CTGAATTCGTA CTCCGGGTCATCTGCTT |
| <b><i>Epha1</i></b>                                                 | Forward | GCCTCGAGCAAGATTGCAAGACTGTGGC  |
|                                                                     | Reverse | CTGAATTCCTCCACATTACAATCCCA    |
| <b><i>Ngfr</i></b>                                                  | Forward | GCCTCGAGTGCCTGGACAGTGTACGTT   |
|                                                                     | Reverse | CTGAATTCAGGAATGAGGTTGTCAGCGG  |
| <b><i>Nkd2</i></b>                                                  | Forward | GCCTCGAGGGAGAGAGAGTCCCGAAGGG  |
|                                                                     | Reverse | CTGAATTCACATGTCCTCTCTGGTGACTT |
